# Supplementary material for: Dynamics of the cell fate specifications during female gametophyte development in Arabidopsis
Source: PLoS Biol. 2021 Mar 26;19(3):e3001123. doi: 10.1371/journal.pbio.3001123 (PMC7997040; doi:10.1371/journal.pbio.3001123)
Supplement: S6 Table — The genes specifically expressed in the egg cells that were DEGs between wild-type and myb98 synergid cells. DEG, differentially expressed gene. (XLSX) [file pbio.3001123.s028.xlsx]

## Sheet: Table.S6
Table. S6: Egg specific genes and DEGs between wild type and myb98 synergid cells.
	TPM values															statistics for identification of DEGs among FG cells in WT									statistics for identification of DEGs in synergid cells
gene_id	CC1	CC2	EC1	EC2	EC3	SY1	SY2	mSY1	mSY2	mSY3	mSY4	ov1	ov2	seedling1	seedling2	nonDEG	DEG_CC	DEG_EC	DEG_SY	DEGall	out.MAP	orderings	ranking	q.value	a.value	m.value	q.value	rank	estimatedDEG	Type	Short_description	Curator_summary
AT1G04380	23.1237	58.62	198.912	223.036	211.77	0.890596	0.309802	687.907	722.843	317.82	653.803	1.94667	0	0.299463	0.070203	0.0131007	0.00727547	0.452647	0.143602	0.383374	DEG_EC	EC>other	837	0.000180174	7.26129	8.6951	1.27432e-07	78	1	protein_coding	2-oxoglutarate (2OG) and Fe(II)-dependent oxygenase superfamily protein	encodes a protein similar to a 2-oxoglutarate-dependent dioxygenase
AT1G08810	0.125319	0	59.9517	13.097	106.412	0.326491	0.111206	67.2617	143.897	117.947	131.762	18.0191	10.2281	8.07909	9.48972	0.00858496	0.0258132	0.707965	0.0527436	0.204893	DEG_EC	EC>other	1767	0.00475624	4.85684	8.04061	0.0059976	362	1	protein_coding	myb domain protein 60	putative transcription factor of the R2R3-MYB gene family. Transcript increases under conditions that promote stomatal opening (white and blue light, abi1-1 mutation) and decreases under conditions that trigger stomatal closure (ABA, desiccation, darkness), with the exception of elevated CO2. Expressed exclusively in guard cells of all tissues. It is required for light-induced opening of stomata.…
AT1G10540	0	0	116.82	157.222	154.536	1.15648	1.11255	82.049	129.085	149.986	67.1135	271.845	115.506	0.74016	1.13019	0.00264964	0.0271493	0.554779	0.00250664	0.412916	DEG_EC	EC>other	341	1.2038e-07	6.73881	5.60925	0.00631051	371	1	protein_coding	nucleobase-ascorbate transporter 8
AT1G10810	0	0	21.2293	0	33.4366	0	0	274.372	338.807	135.646	245.854	1.09835	6.6248	0.68674	0.487816	0.129101	0.0782755	0.518234	0.217514	0.0568754	DEG_EC	EC>other	5521	0.120927	-2.04424	10.74	6.78675e-07	94	1	protein_coding	NAD(P)-linked oxidoreductase superfamily protein
AT1G12080	1.13608	0	826.9	1322.35	1306.96	4.78204	1.00464	2281.01	2876.35	1705.31	2574.89	28.5338	26.7301	20.6368	20.5346	0.000531831	0.00267791	0.889673	0.000554672	0.106562	DEG_EC	EC>other	120	1.82382e-15	8.3337	8.69335	3.66034e-08	68	1	protein_coding	Vacuolar calcium-binding protein-related
AT1G31450	11.7144	7.2269	11170.3	10475.5	9641.38	36.7694	11.4863	16557.1	15164.1	14381	14980	159.983	155.392	0	0	8.81353e-06	0.000537637	0.803928	2.74304e-06	0.195523	DEG_EC	EC>other	8	1.04871e-56	11.908	8.38394	1.1875e-08	63	1	protein_coding	Eukaryotic aspartyl protease family protein
AT1G36160	2.58461	3.41426	18.4031	14.0745	35.8054	0	0.168439	51.2385	31.1703	11.6482	19.7525	85.8419	85.1714	39.8985	27.2232	0.0438461	0.0469874	0.426356	0.204865	0.277946	DEG_EC	EC>other	2307	0.0120769	5.74816	7.36981	0.00470886	339	1	protein_coding	acetyl-CoA carboxylase 1	Encodes acetyl-CoA carboxylase. Mutant displays uncoordinated cell divisions which are enhanced by cytokinins. Mutant also has aberrant organization of the apical region in the embryo and abnormal root and shoot development. Essential for very long chain fatty acid elongation.
AT1G60410	0	0	508.45	588.635	287.876	0.424595	0	167.003	246.808	129.138	285.209	1.00232	0	0	0	0.000400312	0.00127656	0.738943	0.000897603	0.258483	DEG_EC	EC>other	107	2.15237e-16	5.59573	8.94489	4.55699e-05	147	1	protein_coding	F-box family protein
AT1G76180	113.902	38.4299	463.205	625.489	526.975	11.4799	88.0798	1581.36	1777	1873.91	2121.21	99.0365	165.536	853.191	1171.41	0.074038	0.0557907	0.813273	0.0124054	0.044493	DEG_EC	EC>other	3117	0.0277542	10.6733	4.28493	0.00858887	412	1	protein_coding	Dehydrin family protein	Encodes a dehydrin protein whose expression is induced early on in response to dehydration stress. This gene's expression to cold occurs in two waves, with early induction occurring within 1 h and secondary induction occurring 5 h after the beginning of cold stress. Expression is also induced in response to ABA but not in response to 2,4-D, BA, and GA3. ERD14 protein is capable of binding Ca2+, e…
AT2G19900	0	0	34.1788	0	27.4174	0	0	13.9151	37.1794	104.162	65.4798	0	0	0	0	0.115958	0.0722368	0.545649	0.206272	0.0598841	DEG_EC	EC>other	4003	0.0559906	-2.04424	9.21989	0.00427469	332	1	protein_coding	NADP-malic enzyme 1	The malic enzyme (EC 1.1.1.40) encoded by AtNADP-ME1 is expressed in response to developmental and cell-specific signals. The enzyme is active in vitro and appears to function as a homohexamer or homooctamer. It is believed to be a cytosolic protein.
AT2G26410	1.26846	0	50.4793	81.8534	36.2788	0	0	66.1245	30.8053	67.0544	71.2738	1.65355	0	0.068397	0.204979	0.0147737	0.00527955	0.604675	0.0948215	0.28045	DEG_EC	EC>other	1360	0.00189504	-2.04424	9.29844	0.00152651	261	1	protein_coding	IQ-domain 4
AT2G35615	4.17736	8.37346	2103.21	1912.71	1438.38	13.0051	3.64775	4800.85	5987.78	5962.22	5475.21	155.461	82.3298	0	0	0.000108763	0.00122036	0.926904	0.000144165	0.0716227	DEG_EC	EC>other	69	1.87571e-20	10.4748	8.47138	1.65301e-08	65	1	protein_coding	Eukaryotic aspartyl protease family protein
AT2G39110	30.455	85.6322	741.481	731.333	569.579	1.1328	0.498942	245.391	410.983	420.602	342.865	1.54236	0	0.723581	0.712846	0.00248328	0.00205691	0.489574	0.0293598	0.476526	DEG_EC	EC>other	180	1.57639e-11	7.25821	7.56956	5.39066e-06	120	1	protein_coding	Protein kinase superfamily protein
AT2G46530	0	0.928705	161.262	255.044	363.01	0	0	169.018	24.1478	22.1013	94.7691	7.95036	0	12.0799	9.93445	0.00114096	0.000680446	0.693812	0.00846663	0.2959	DEG_EC	EC>other	171	7.51556e-12	-2.04424	9.73047	0.000453867	207	1	protein_coding	auxin response factor 11
AT3G08720	0.350529	25.9117	24.9335	55.0383	72.4605	1.17317	2.74271	94.646	170.419	181.428	126.179	25.3102	10.7754	9.02136	11.5141	0.277225	0.0730155	0.467444	0.14254	0.0397754	DEG_EC	EC>other	8169	0.267705	7.49423	5.10819	0.00536354	347	1	protein_coding	serine/threonine protein kinase 2	Encodes a ribosomal-protein S6 kinase. Gene expression is induced by cold and salt (NaCl). Activation of AtS6k is regulated by 1-naphthylacetic acid and kinetin, at least in part, via a lipid kinase-dependent pathway. Phosphorylates specifically mammalian and plant S6 at 25 degrees C but not at 37 degrees C. Involved in translational up-regulation of ribosomal proteins.
AT3G50070	9.50991	41.1096	110.696	148.07	69.3442	0.577675	6.43404	375.692	387.767	529.881	468.138	272.252	222.248	14.9588	11.5725	0.155439	0.0473759	0.61779	0.131789	0.0476069	DEG_EC	EC>other	5911	0.142456	8.03724	6.02775	0.000868298	235	1	protein_coding	CYCLIN D3;3	Encode CYCD3;3, a CYCD3 D-type cyclin. Important for determining cell number in developing lateral organs. Mediating cytokinin effects in apical growth and development.
AT4G00220	0.433643	0	64.4183	1.3123	62.5526	0	0	87.5035	298.845	99.598	111.711	1.63181	1.65281	0.447752	0.497334	0.0551578	0.0495807	0.602834	0.181328	0.1111	DEG_EC	EC>other	3391	0.0361066	-2.04424	9.61865	0.000433072	206	1	protein_coding	Lateral organ boundaries (LOB) domain family protein	Encodes a protein containing a LOB domain that is expressed in embryos, flower primordium and lateral floral organ boundaries. Overexpression is correlated with activation of STM and KNAT1 and down regulation of PIN1 and reduced auxin transport levels. Ectopic expression in plants results in premature termination of the shoot apical meristem and small, lobed leaves.
AT4G36860	8.17469	43.1744	313.776	352.578	403.254	0.972131	0	138.316	65.2638	76.6891	215.875	15.3732	20.0236	16.1661	20.7117	0.00349293	0.00219273	0.764212	0.0143249	0.215777	DEG_EC	EC>other	379	3.36856e-07	6.43719	7.01311	0.00398709	328	1	protein_coding	LIM domain-containing protein
AT5G04140	0	0.548036	312.422	142.755	232.088	0	0	22.3747	33.7228	22.014	29.8521	0.665916	2.74029	359.277	280.876	0.000175407	0.000131271	0.690694	0.00157315	0.307426	DEG_EC	EC>other	102	6.93481e-17	-2.04424	9.41962	0.000712541	224	1	protein_coding	glutamate synthase 1	Encodes a gene whose sequence is similar to ferredoxin dependent glutamate synthase (Fd-GOGAT). Expression in leaves is induced by light and sucrose. Proposed to be involved in photorespiration and nitrogen assimilation.
AT5G05270	0	0	0	0	11.0079	0	0	68.2078	163.613	87.4485	174.453	110.022	48.7321	8.6352	7.89643	0.240758	0.117164	0.327612	0.278511	0.035955	DEG_EC	EC>other	15081	0.703342	-2.04424	9.60421	0.000330175	199	1	protein_coding	Chalcone-flavanone isomerase family protein
AT5G28910	0	0	11.9429	0.264235	0	0	0	293.541	78.3363	247.034	90.8513	0	0	1.20511	0.897314	0.190475	0.106018	0.404963	0.2541	0.044444	DEG_EC	EC>other	10283	0.400863	-2.04424	10.8105	2.99587e-06	109	1	protein_coding
AT5G48510	0	0	287.353	729.823	54.3875	0	0	213.328	205.868	519.864	183.213	3.21918	0	0	0.179782	0.00572914	0.00735423	0.873546	0.0174998	0.0958704	DEG_EC	EC>other	386	3.87218e-07	-2.04424	9.97787	3.39089e-05	143	1	protein_coding	BTB/POZ domain-containing protein
AT5G56300	0	0	3.45723	6.76935	66.8852	0	0	178.432	298.57	207.494	150.627	18.1391	16.1906	0.624617	0.542401	0.0447733	0.0384996	0.731202	0.105277	0.0802483	DEG_EC	EC>other	3145	0.028597	-2.04424	10.4969	2.99587e-06	108	1	protein_coding	gibberellic acid methyltransferase 2	A member of the Arabidopsis SABATH methyltransferase gene family. Encodes GAMT2, a methyltransferase that uses S-adenosine-L-methionine (SAM) as a methyl donor to methylate the carboxyl group of GAs, resulting in the methyl esters of GAs (MeGAs). Expressed most highly in the siliques during seed development.
AT5G62470	0	0	0	2.70832	0	0	0	66.3342	37.0799	119.402	18.3389	66.3735	179.625	24.6216	25.2437	0.258848	0.133929	0.306039	0.267597	0.0335873	DEG_EC	EC>other	18125	0.8732	-2.04424	9.04175	0.0073343	393	1	protein_coding	myb domain protein 96	Encodes a R2R3 type Myb transcription factor whose expression is strongly induced by abscisic acid. Mediates abscisic acid signaling during drought stress response.
AT5G64720	9.05576	28.4792	4981.89	3290.04	3555.34	20.7531	7.16221	8078.96	9493.52	8710.14	10801	117.221	200.859	0.154329	0	4.72369e-05	0.000289441	0.964104	8.20286e-05	0.0354771	DEG_EC	EC>other	86	2.24744e-18	9.77936	8.42554	9.90433e-09	61	1	protein_coding	Protein of unknown function (DUF1278)
